# Supplementary material for: Single-Walled Carbon Nanotubes Modify Leaf Micromorphology, Chloroplast Ultrastructure and Photosynthetic Activity of Pea Plants
Source: MDPI journal article supplement (doi:10.3390/ijms22094878), 2021-05-05
Supplement: s1 [file s1]

## SUPPLEMENTARY FIGURES

# Single-walled carbon nanotubes modify leaf micromorphology, chloroplast ultrastructure and photosynthetic activity of pea plants

Violeta Velikova <sup>1, \*</sup>, Nia Petrova <sup>2</sup>, László Kovács <sup>3</sup>, Asya Petrova <sup>1</sup>, Dimitrina Koleva <sup>4</sup>, Tsonko Tsonev <sup>2</sup>, Stefka Taneva <sup>2</sup>, Petar Petrov <sup>5</sup>, Sashka Krumova <sup>2, \*</sup>

<sup>1</sup> Institute of Plant Physiology and Genetics, Bulgarian Academy of Sciences, Acad G. Bonchev Str. Bl. 21, 1113 Sofia, Bulgaria; e-mail@ violet@bio21.bas.bg (V.V.), petrova\_asya@abv.bg (A.P.)

<sup>2</sup> Institute of Biophysics and Biomedical Engineering, Bulgarian Academy of Sciences, Acad G. Bonchev Str. Bl. 21, 1113 Sofia, Bulgaria; e-mail@ zlatkova.nia@gmail.com (N.P.), tsonev@gmail.com (T.T.), sgtaneva@gmail.com (S.T.), sashka.b.krumova@gmail.com (S.K.)

<sup>3</sup> Institute of Plant Biology, Biological Research Center, Temesvári krt. 62, 6726 Szeged, Hungary; e-mail@ kovacs.laszlo@brc.hu

<sup>4</sup> Faculty of Biology, Sofia University “St. K. Ohridski”, 8 Dragan Tsankov, 1164 Sofia, Bulgaria; e-mail@ koleva@biofac.uni-sofia.bg

<sup>5</sup> Institute of Polymers, Bulgarian Academy of Sciences, Acad G. Bonchev Str. Bl. 103, 1113 Sofia, Bulgaria; e-mail@ ppetrov@polymer.bas.bg

\* Correspondence: e-mail@ violet@bio21.bas.bg (V.V.), sashka.b.krumova@gmail.com (S.K.)

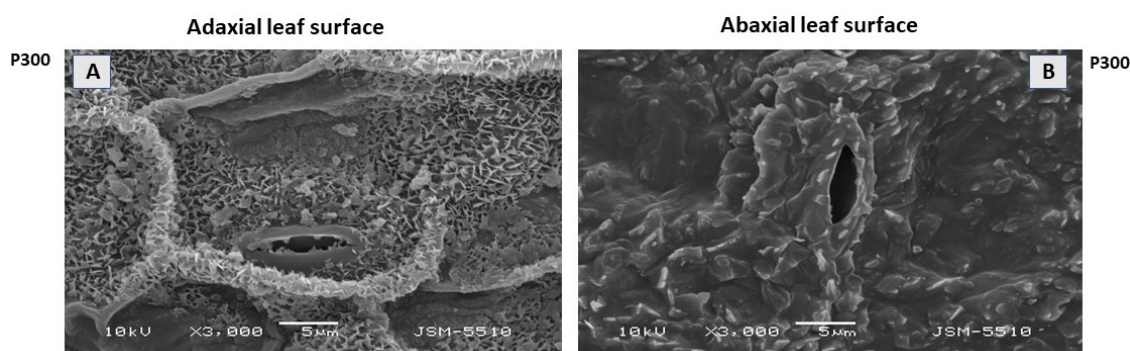

**Figure S1.** Cuticle and epicuticular waxes at the adaxial (A) and abaxial (B) leaf surface of pea plants seven days after spraying with P<sub>300</sub>.

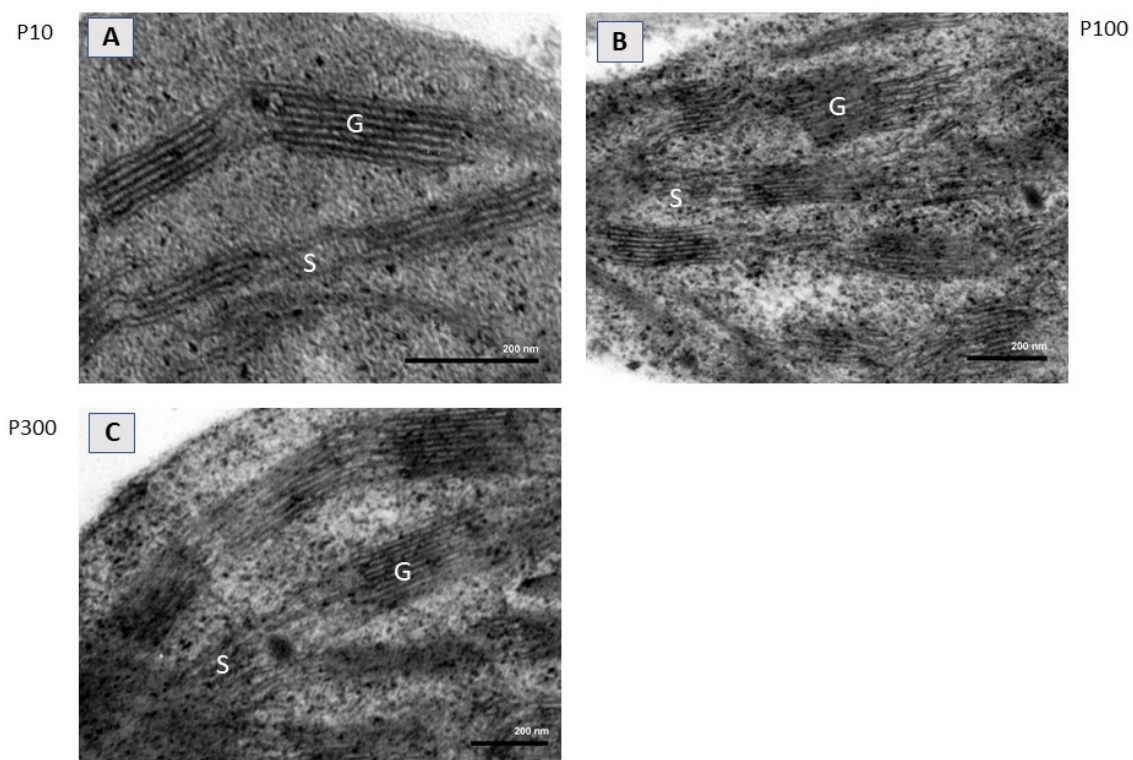

**Figure S2.** Representative electron micrographs of chloroplast cross section taken from intact pea leaves seven days after spraying with different concentrations of “Pluronic” P-85 (A, P<sub>10</sub>; B, P<sub>100</sub>; P<sub>300</sub>, C). G – grana, S – stroma lamellae.
